# Supplementary material for: Applications of the Microscale Thermophoresis Binding Assay in COVID-19 Research
Source: MDPI journal article supplement (doi:10.3390/v15071432), 2023-06-25
Supplement: s1 [file s1]

# Supplementary Figure:

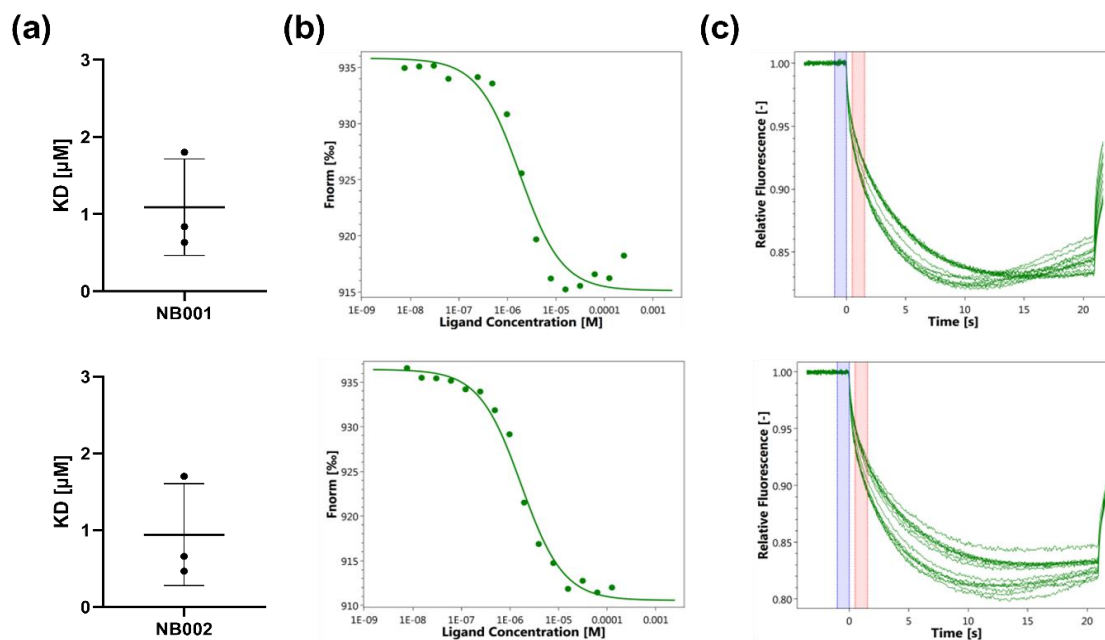

**Figure S1.** Binding of SARS-CoV-2-S1-RBD to the peptides NB001 and NB002. (a) The  $K_D$  for the binding of NB001 to RBD is 1.08  $\mu\text{M}$ , and that for NB002 is 0.94  $\mu\text{M}$ . The following serial dilutions were used for the peptides: NB001R, 1mM-30nM; NB001 and NB002, 250  $\mu\text{M}$ -7.6nM. (b) Representative dose response curves (c) MST traces. The red bar indicates the selected time point for the dose response used to determine the  $K_D$ .
